# Supplementary material
Source: publisher figshare collection journal article supplement (https://gsajournals.figshare.com/ndownloader/files/28321905)
Supplement: Supplementary file 1 [file 28321905]

## Sheet: Table S3
Table S3 GO enrichment analysis of genes in the candidate region
#GO_classify	All gene	DIFF gene
cellular component
extracellular region	1181	18
cell	15683	210
nucleoid	19	0
membrane	9041	124
virion	216	2
cell junction	600	9
extracellular matrix	47	1
membrane-enclosed lumen	509	13
macromolecular complex	3652	58
organelle	11876	147
extracellular region part	48	1
organelle part	5091	72
virion part	216	2
membrane part	6293	95
cell part	15732	210
molecular function
protein binding transcription factor activity	113	0
nucleic acid binding transcription factor activity	1444	15
catalytic activity	22539	279
receptor activity	788	11
guanyl-nucleotide exchange factor activity	48	2
structural molecule activity	851	9
transporter activity	2250	23
binding	19960	227
electron carrier activity	450	8
antioxidant activity	343	3
metallochaperone activity	6	0
enzyme regulator activity	431	11
protein tag	5	0
translation regulator activity	1	0
nutrient reservoir activity	108	0
molecular transducer activity	1167	15
biological process
reproduction	533	15
cell killing	7	0
immune system process	465	6
metabolic process	26845	350
cellular process	21411	284
reproductive process	1494	24
biological adhesion	116	3
signaling	2563	29
multicellular organismal process	2371	36
developmental process	3157	44
growth	480	11
locomotion	13	0
single-organism process	18634	245
rhythmic process	72	0
response to stimulus	6941	100
localization	5675	79
multi-organism process	954	10
biological regulation	8938	127
cellular component organization or biogenesis	4513	74
